# Supplementary material
Source: publisher figshare collection journal article supplement (https://acs.figshare.com/ndownloader/files/29093427)
Supplement: Supplementary file 1 [file 29093427]

## Supporting info

### Gas-phase Oxidation of NO<sub>2</sub> to HNO<sub>3</sub> by Phenol: Atmospheric Implications

Koushik Mondal<sup>a</sup>, Souvick Biswas<sup>a</sup>, Aparajeo Chattopadhyay<sup>a, #</sup>, Piyali Chatterjee<sup>a</sup> and Tapas Chakraborty<sup>a\*</sup>

<sup>a</sup> School of Chemical Sciences, Indian Association for the Cultivation of Science, 2A Raja S. C. Mullick Road, Jadavpur, Kolkata 700032, India

<sup>#</sup> Present address: Chemical Sciences Laboratory, National Oceanic and Atmospheric Administration, 325 Broadway, Boulder, CO 80305, USA

&

Cooperative Institute for Research in Environmental Sciences, University of Colorado, Boulder, CO 80309, USA

\* Corresponding author:

Email: [pctc@iacs.res.in](mailto:pctc@iacs.res.in)

Supporting information includes 2 Figures, 1 Table, and 6 pages.

#### Contents:

|                                                                                                                                                                    |    |
|--------------------------------------------------------------------------------------------------------------------------------------------------------------------|----|
| S 1a: FTIR spectrum of <i>o</i> -nitrophenol.....                                                                                                                  | S2 |
| S 1b: FTIR Spectrum of nitric acid.....                                                                                                                            | S3 |
| S 2a: Calculation of second order rate law.....                                                                                                                    | S4 |
| S 2b: Calculation of second order rate law.....                                                                                                                    | S5 |
| Table S 1: Characteristic vibrational frequencies of the species identified, and absorption cross-sections of the particular modes according to PNNL database..... | S6 |

S 1a: FTIR spectrum of *o*-nitrophenol

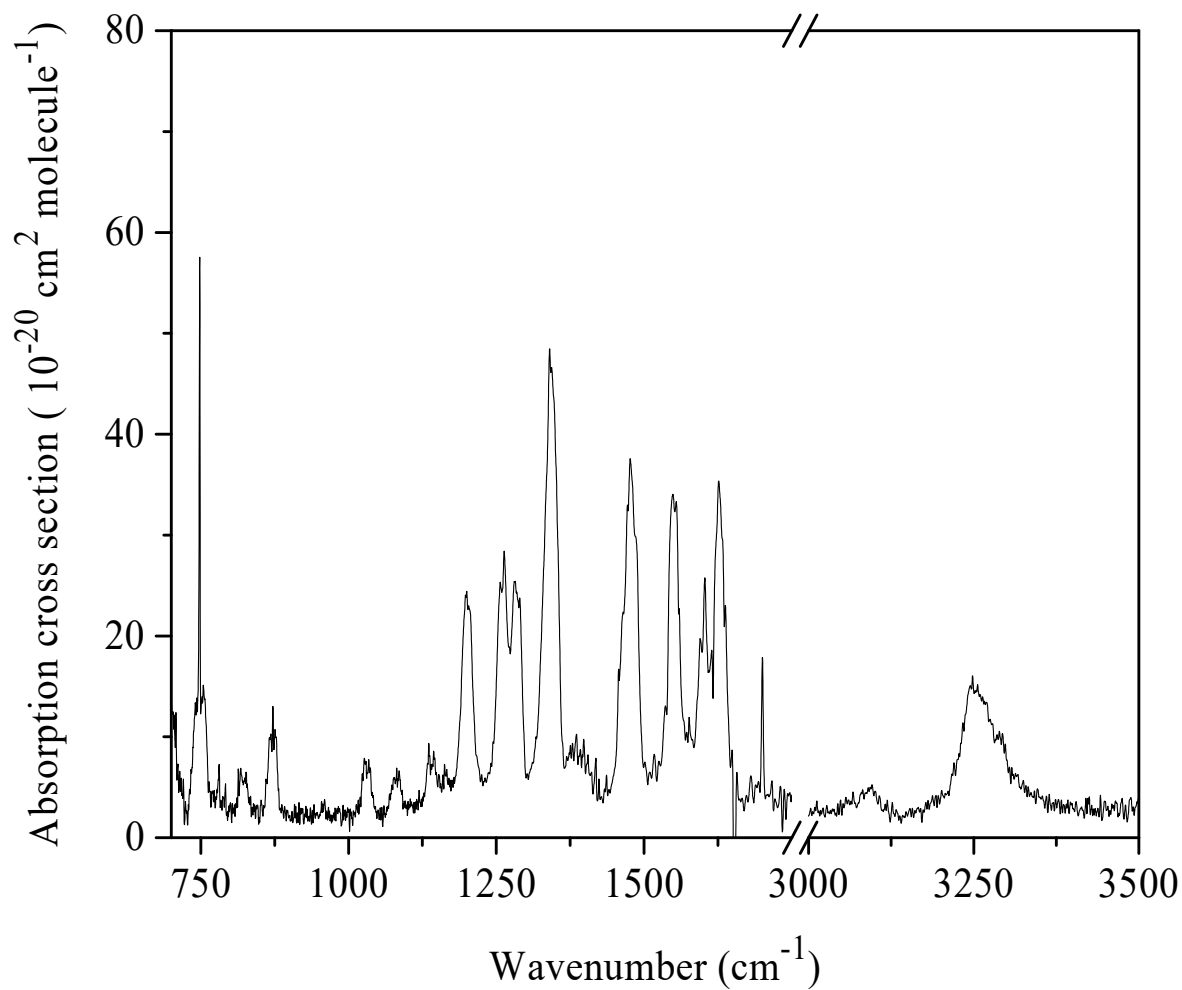

Spectrum of  $\text{HNO}_3$  was recorded after diluting 2 mbar of  $\text{HNO}_3$  to 1 bar by using UHP  $\text{N}_2$ .

S 1b: FTIR Spectrum of nitric acid

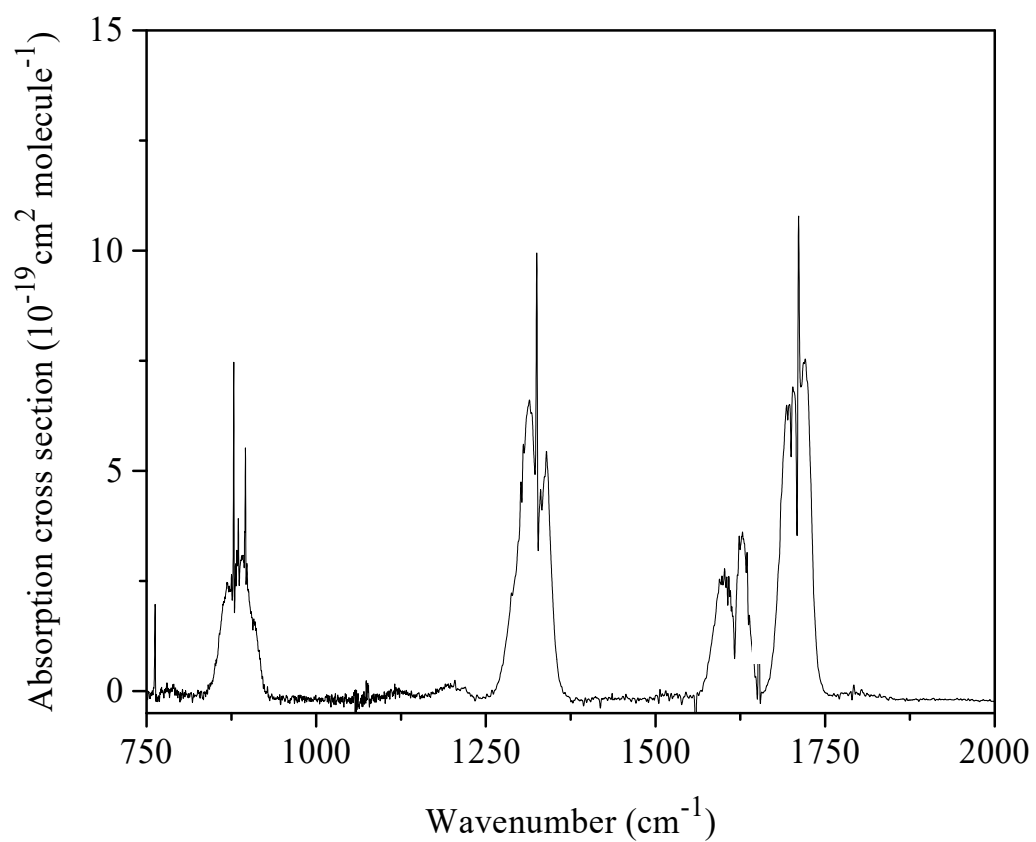

Spectrum of *o*-nitrophenol was recorded after diluting 400 mbar of *o*-nitrophenol- $\text{N}_2$  mixture to 1 bar by using UHP  $\text{N}_2$ .

S 2a: Calculation of second order rate law:

Rate law for the reaction

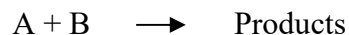

Rate of the reaction:

$$-d[A]/dt = k[A][B] \quad \text{-----1}$$

Integrated form of this differential equation is

$$\ln([A]_0[B])/([A][B]_0) = k([A]_0 - [B]_0)t \quad \text{-----2}$$

Where  $[A]_0$  = initial concentration of A and  $[A]$  = concentration of A at t time

$[B]_0$  = initial concentration of B and  $[B]$  = concentration of B at t time

So the plot of  $\ln([A]_0[B])/([A][B]_0)$  vs t will be a straight line and slope of the plot =  $k([A]_0 - [B]_0)$

In our case

A = PhOH

B = N<sub>2</sub>O<sub>4</sub>

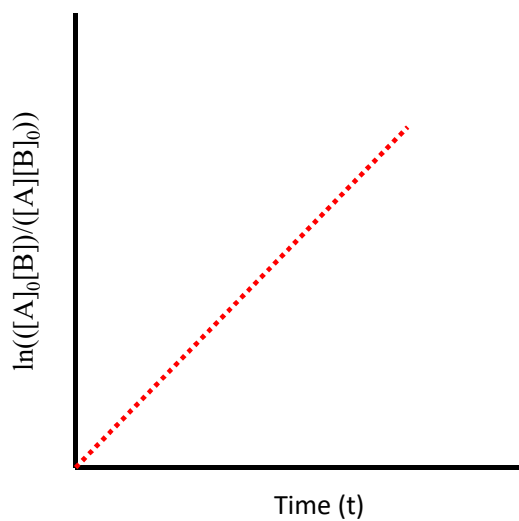

S 2b: Calculation of third order rate law:

Rate law for the reaction

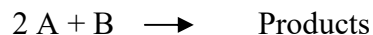

Rate of the reaction:

$$-d[A]/dt = k[A]^2[B] \quad \text{-----1}$$

Integrated form of this differential equation is

$$\ln \left( \frac{([B]_0 [A])}{([A]_0 [B])} \right) + \frac{2([B]_0 - [B])(2[B]_0 - [A]_0)}{([A]_0 [A])} = kt(2[B]_0 - [A]_0)^2 \quad \text{---2}$$

Where  $[A]_0$  = initial concentration of A and  $[A]$  = concentration of A at t time

$[B]_0$  = initial concentration of B and  $[B]$  = concentration of B at t time

So the plot of  $\ln \left( \frac{([B]_0 [A])}{([A]_0 [B])} \right) + \frac{2([B]_0 - [B])(2[B]_0 - [A]_0)}{([A]_0 [A])}$  vs t will be a straight line and slope of the plot =  $kt(2[B]_0 - [A]_0)^2$

If  $Y = \ln \left( \frac{([B]_0 [A])}{([A]_0 [B])} \right) + \frac{2([B]_0 - [B])(2[B]_0 - [A]_0)}{([A]_0 [A])}$  taken then plot of Y vs t will be a straight line passing through origin.

In our case

A = NO<sub>2</sub>

B = PhOH

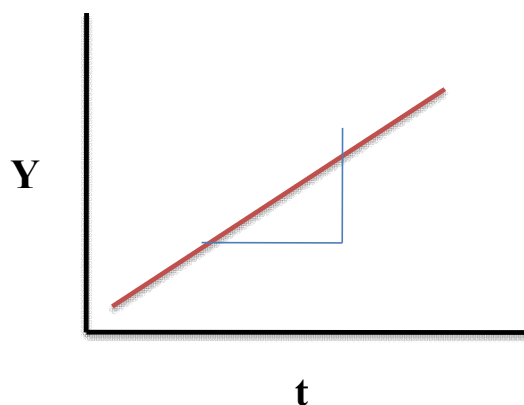

Table S 1

| Frequencies<br>(cm <sup>-1</sup> ) | Species               | Vibrational mode                 | Absorption cross-section (cm <sup>2</sup><br>molecule <sup>-1</sup> ) |
|------------------------------------|-----------------------|----------------------------------|-----------------------------------------------------------------------|
| 878                                | HNO <sub>3</sub>      | -NO <sub>2</sub> deformation     | 6.81×10 <sup>-19</sup>                                                |
| 1325                               | HNO <sub>3</sub>      | -NO symmetric<br>stretching      | 9.95×10 <sup>-19</sup>                                                |
| 1711                               | HNO <sub>3</sub>      | -NO anti symmetric<br>stretching | 1.04×10 <sup>-18</sup>                                                |
| 748                                | <i>o</i> -nitrophenol | -OH bending                      | 5.70×10 <sup>-19</sup> <sup>a</sup>                                   |
| 3250                               | <i>o</i> -nitrophenol | -OH stretching                   | 1.61×10 <sup>-19</sup> <sup>a</sup>                                   |
| 1875                               | NO                    | NO stretching                    | 1.03×10 <sup>-19</sup>                                                |

a = estimated in the present study.

**Table S 1:** Characteristic vibrational frequencies of the species identified, and absorption cross-sections of the particular modes according to PNNL<sup>48</sup> database. Absorption cross-section of *o*-nitrophenol has been estimated in the present study (a).
